1           **Malaria in Pregnancy Regulates P-glycoprotein (P-gp/*Abcb1a*) and ABCA1**  
2                           **Efflux Transporters in the Mouse Visceral Yolk Sac**

3

4   Martinelli LM<sup>1</sup>; Fontes KN<sup>2</sup>; Reginatto MW<sup>2</sup>; Andrade CBV<sup>2</sup>; Monteiro VRS<sup>2</sup>;  
5   Gomes HR<sup>2</sup>, Silva-Filho JL<sup>3</sup>; Pinheiro AAS<sup>3</sup>; Vago AR<sup>1</sup>; Almeida FRCL<sup>1</sup>; Bloise  
6   FF<sup>2</sup>; Matthews SG<sup>4-7</sup>; Ortiga-Carvalho TM<sup>2</sup>; Bloise E<sup>1</sup>

7

8   <sup>1</sup>Department of Morphology, Institute of Biological Sciences, Federal University of  
9   Minas Gerais, Brazil.

10   <sup>2</sup>Laboratory of Translational Endocrinology and <sup>3</sup>Laboratory of Immunology and  
11   Biochemistry of Parasitic Diseases, Institute of Biophysics Carlos Chagas Filho,  
12   Federal University of Rio de Janeiro, Brazil.

13   <sup>4</sup>Departments of Physiology, <sup>5</sup>Obstetrics and Gynecology and <sup>6</sup>Medicine, University  
14   of Toronto, Canada.

15   <sup>7</sup>Lunenfeld-Tanenbaum Research Institute, Mount Sinai Hospital, Ontario, Canada.

16

17   Corresponding author:

18   Enrico Bloise, Department of Morphology N3-292, Institute of Biological Sciences,  
19   Federal University of Minas Gerais, Belo Horizonte – Minas Gerais – Brazil. CEP:  
20   31270-901.

21   Tel: +55 31 3409-2783

22   E-mail: ebloise@icb.ufmg.br

23

24   **KEYWORDS:** Malaria in Pregnancy (MiP); *Plasmodium berghei* ANKA; yolk sac; P-  
25   glycoprotein (P-gp); ABCA1; ABCG1; Breast Cancer Resistance Protein (BCRP);  
26   Infection.

27 ABSTRACT

28 Malaria in pregnancy (MiP) induces intrauterine growth restriction (IUGR) and  
29 preterm labor (PTL). However, its effects on yolk sac morphology and function are  
30 largely unexplored. We hypothesized that MiP modifies yolk sac morphology and  
31 efflux transport potential by modulating ABC efflux transporters. C57BL/6 mice  
32 injected with *Plasmodium berghei* ANKA ( $5 \times 10^5$  infected-erythrocytes) on gestational  
33 day (GD) 13.5, were subjected to yolk sac membrane harvesting on GD18.5 for  
34 histology, qPCR and immunohistochemistry. MiP did not alter the volumetric  
35 proportion of the yolk sac's histological components. However, it increased levels of  
36 *Abcb1a* mRNA (encoding P-glycoprotein) and macrophage migration inhibitory  
37 factor (*Mif*-chemokine), whilst decreasing *Abcg1* ( $P < 0.05$ ); without altering *Abca1*,  
38 *Abcb1b*, *Abcg2*, *Snat1*, *Snat2*, interleukin (*Il*)- $1\beta$  and C-C Motif Chemokine Ligand 2  
39 (*Ccl2*). Transcripts of *Il-6*, chemokine (C-X-C motif) ligand 1 (*Cxcl1*), *Glut1* and  
40 *Snat4* were not detectable. ABCA1, ABCG1, breast cancer resistance protein (BCRP)  
41 and P-gp, were primarily immunolocalized to the cell membranes and cytoplasm of  
42 endodermic epithelium but also in the mesothelium and in the endothelium of  
43 mesodermic blood vessels. Intensity of P-gp labeling was stronger in both endodermic  
44 epithelium and mesothelium, whereas ABCA1 labeling increased in the endothelium  
45 of the mesodermic blood vessels. The presence of ABC transporters in the yolk sac  
46 wall suggest that this fetal membrane acts as an important protective gestational  
47 barrier. Changes in ABCA1 and P-gp in MiP may alter the biodistribution of toxic  
48 substances, xenobiotics, nutrients and immunological factors within the fetal  
49 compartment and participate in the pathogenesis of malaria induced-IUGR and PTL.

50

51 INTRODUCTION

52 The harmful effects of malaria in pregnancy (MiP) include high rates of  
53 maternal anemia and death, as well as spontaneous abortion, fetal intrauterine growth  
54 restriction (IUGR), preterm labor (PTL), low birth weight, fetal/neonatal demise and  
55 impaired postnatal cognitive and neurosensory development [1-3]. MiP is  
56 characterized by adherence of *Plasmodium falciparum*-infected erythrocytes to  
57 specific syncytiotrophoblast glycosaminoglycans; a condition referred to as “placental  
58 malaria” [3,4]. In response, the placental barrier may undergo various adaptive  
59 changes that comprise activation and migration of immune cells, alteration of

60 cytokine and chemokine output [2,5], intervillitis, decreased enrichment of  
61 syncytiotrophoblast-microvilli and lower expression of placental glucose (GLUT1),  
62 amino acid (*SNAT1*, *SNAT2*, *Cat1*, *Lat1* and *4F2hc*), solute carrier (SLC) drug uptake  
63 (*Oatp2b1*, *Oct3*, *Ent1* and *Ent2*) and nutrient/drug efflux ABC transport systems  
64 (ABCA1, BCRP and P-gp) [6-11].

65 The ATP-Binding Cassette (ABC) transport system is highly expressed in  
66 different trophoblastic lineages [12-14]. Its disruption has been associated with IUGR,  
67 PTL, pre-eclampsia and chorioamnionitis [13,15-17]. In this context, reports from  
68 different groups have demonstrated that it participates in the adaptive trophoblastic  
69 responses to maternal infection [9,12,14,16-18]. Comprised of 50 transporters divided  
70 into seven sub-classes ranging from ABCA through ABCG [19], these  
71 transmembrane transporters are expressed in different cell types, including those from  
72 biological barriers [12]. They are responsible for the efflux of diverse endogenous and  
73 exogenous substrates, from one side to the other of the plasm membrane [20]. There  
74 are a multitude of endogenous substrates including lipids, phospholipids, cytotoxic  
75 oxysterols, amino acids, steroid hormones, folate, metabolites and pro-inflammatory  
76 cytokines and chemokines. Exogenous substrates comprise environmental toxins  
77 (bisphenol A, ivermectin, pesticides) and clinically relevant drugs (antibiotics,  
78 antiretrovirals, antidepressants and synthetic glucocorticoids). ABC transporters are  
79 major components of the immune response and mediate nutrient transfer and fetal  
80 protection against drugs and environmental toxins that may be circulating in the  
81 maternal blood [12,20,21].

82 The lipid transporters, ABCA1 and ABCG1 (encoded by the *ABCA1* and  
83 *ABCG1* genes, respectively), and the multidrug resistance transporters, P-glycoprotein  
84 (P-gp/*ABCB1*) and breast cancer-related protein (BCRP/*ABCG2*) are amongst the  
85 best-described ABC transporters in the syncytial barrier. ABCA1, P-gp and BCRP are  
86 predominantly expressed in the apical membrane of the syncytiotrophoblast, and  
87 efflux their substrates from the fetal side into the maternal circulation, whereas  
88 ABCG1 is localized in the syncytiotrophoblast's basolateral membrane and efflux  
89 cholesterol into the fetal circulation [12].

90 *Plasmodium berghei* ANKA (PBA) infection is largely used to mimic malaria  
91 infection in mice. In pregnant BALB/c mice, PBA decreases placental *Abca1*, *Abcb1a*

92 and *Abcb1b* (both encoding P-gp in rodents) and *Abcg2* [11]. Similarly, in pregnant  
93 C57BL/6 dams, PBA leads to IUGR, PTL and impairs the placental expression of  
94 ABCA1/*Abca1*, P-gp/*Abcb1b* and BCRP/*Abcg2* [9], suggesting that MiP has the  
95 potential to increase fetal exposure to a range of clinically relevant substrates capable  
96 of profoundly impacting fetal outcome, via dysfunction of ABC transporters in the  
97 placental barrier.

98         The human yolk sac is the major hematopoietic site [22] and is the source of  
99 primordial germ cells in early pregnancy [23]. It is estimated that human yolk sac is  
100 viable until the 49<sup>th</sup> day of gestation [24]. Emerging evidence suggests the yolk sac is  
101 an important nutrient exchange site between the coelomic fluid and the fetal  
102 capillaries present in its mid-mesodermal layer; or alternatively, it delivers nutrients to  
103 the embryo primitive gut via the vitelline duct [24-26]. In mice, the visceral portion of  
104 the yolk sac involves the embryo amniotic membrane and is functional throughout  
105 pregnancy, mediating the transport of critical substances from the mother to the fetus;  
106 acting as a syncytiotrophoblast equivalent throughout intrauterine development  
107 [27,28]. It is known that human [24] and mouse [24,29] yolk sac express different  
108 ABC transport-carriers, suggesting that this membrane acts together with the placenta  
109 and other fetal membranes to form an efficient protective barrier during gestation.

110         Despite the importance of the yolk sac for embryo and fetal development, no  
111 studies have investigated the effects of MiP on yolk sac morphology and efflux  
112 transport expression. In the present study, we hypothesized that MiP, in a murine  
113 model of malaria induced-IUGR and PTL, modifies the yolk sac morphology and  
114 efflux transport potential, via modulation of key ABC efflux transporters. Improved  
115 knowledge as to how the yolk sac responds to MiP may improve the understanding of  
116 the mechanisms by which malaria impacts pregnancy outcome.

117

## 118 MATERIAL AND METHODS

### 119 Animals

120         An animal model of severe experimental malaria, which recapitulates many of  
121 the features of the human malarial disease in pregnancy, including placental malarial,  
122 IUGR, low birth weight and PTL was used as previously described [9]. This model

123 resulted in a 20% rate of PTL in infected dams, however, all analyses were  
124 undertaken in the yolk sac of fetuses born at GD18.5 (i.e. term). Briefly, C57BL/6  
125 female mice (8 to 10 week-old) were housed at room temperature (22°C), with a light  
126 cycle of 12h light/12h dark and were mated. Animals were maintained on a  
127 commercial Nuvilab ® CR1 (Nuvilab, PR, Brazil) chow and water ad libitum. Mating  
128 was confirmed by the presence of a vaginal plug, and was defined as gestational day  
129 (GD) 0.5. Pregnant dams were injected intraperitoneally (i.p.) with  $5 \times 10^5$  erythrocytes  
130 infected with *Plasmodium berghei* ANKA (PBA group) or with saline (control group)  
131 on GD13.5. Euthanasia was performed at GD18.5, using a pentobarbitol overdose  
132 (300 mg/kg i.p.), followed by maternal and fetal decapitation. Six PBA-infected dams  
133 from our previous cohort [9], which exhibited peripheral parasitemia (approximately  
134 16% of infected erythrocytes) on GD18.5, were included in this study. Approval was  
135 obtained from the Institutional ethics committee (CEUA-190/13), registered within  
136 the Brazilian National Council for Animal Experimentation Control (protocol number  
137 01200.001568 / 2013-8). All procedures followed the “Principles of Laboratory  
138 Animal Care” formulated by the National Society for Medical Research and the U.S.  
139 National Academy of Sciences Guide for the Care and Use of Laboratory Animals.

140

141 Volumetric proportion assessment of mouse visceral yolk sac

142 The visceral yolk sac of PBA-infected and control animals (n=6/group) were  
143 dissected and immediately immersed in buffered 4% paraformaldehyde phosphate  
144 solution (24h). After fixation, samples were dehydrated in an ethanol series,  
145 diaphanized in xylene, and embedded in paraffin wax (Histopar, SP, Brazil). Sections  
146 (4µm) were stained with hematoxylin and eosin (H&E). Image acquisition and  
147 analysis were performed on a Zeiss Axiolab 1 photomicroscope, coupled with a CCD  
148 camera and computer running Zeiss Axiovision (Carl Zeiss, NY, EUA). The  
149 histomorphological analysis was undertaken using the Fiji ImageJ 1.0 program  
150 (ImageJ, WI, USA). Estimation of relative volume of the different components of the  
151 yolk sac (endodermic epithelium, mesodermal connective tissue, mesodermal blood  
152 vessels and mesothelium) was undertaken by superimposing yolk sac histological  
153 photomicrographs with a grid of equidistant points (measuring 25µm distance  
154 between two points). 1000 points coinciding with each of the histological components

155 evaluated were recorded, yielding a variable number of histological sections evaluated  
156 per dam; which corresponded to a total average area of 455 mm<sup>2</sup> per dam. The  
157 volumetric proportion (VP) of each histological component was calculated as VP =  
158 NP × 100/1000, where NP = number of equivalent points on each histological  
159 component [30].

160

## 161 qPCR

162 Samples of the visceral yolk sac (n=6/group) were immersed in RNA Later  
163 solution (Invitrogen, MA, USA) and frozen at -20°C until further processing.  
164 Extraction of total RNA was undertaken using Trizol (Invitrogen) with  
165 homogenization conducted using a TissueLyser LT (Qiagen, Hilden, Germany).  
166 Concentration and purity of samples were determined by spectrophotometric analysis  
167 (Implen nanofotometer, Munich, Germany). Total RNA (1µg) was reverse-transcribed  
168 into cDNA, using the High Capacity cDNA Reverse Transcription kit (Applied  
169 Biosystems, CA, USA), according to the manufacturer's instructions. cDNA (4ul) was  
170 added to the primer-containing mix (intron-exon spanning) of each gene of interest  
171 (Table 1), as well as with the fluorescent DNA interlayer Eva Green (Biotium, CA,  
172 USA), in a total volume of 6µL. The quantification of each gene of interest relative to  
173 the reference genes, *Ywhaz*, *Ppib* and *Gapdh* (table 1), was performed in the  
174 QuantStudio Real-Time PCR (Applied Biosystems, CA, USA), with the following  
175 amplification cycles: initial denaturation at 50°C for 2 min and then at 95°C for 10  
176 min, followed by 40 cycles of denaturation at 95°C for 15 sec. Annealing was  
177 performed at 60°C for 30 sec and extension at 72°C for 45 sec. Differences in mRNA  
178 gene expression were calculated according to the 2<sup>-ΔΔCT</sup> method [31] and the assay  
179 was considered acceptable when its efficiency ranged from 95% to 105%.

180

## 181 Immunohistochemistry

182 Yolk sac sections (7µm, n=6/group) were dewaxed and rehydrated. Term  
183 mouse placental sections were processed simultaneously, as positive controls.  
184 Endogenous peroxidase activity was blocked using the Hydrogen Peroxide Block kit  
185 (Springer, Berlin, Germany). Antigen retrieval was performed by heating the sections

186 in Tris-EDTA buffer pH 9, followed by microwave heating in citrate buffer (0.1M,  
187 pH 6) allowing to cool on ice (10 min). Blocking was performed by incubation with  
188 skimmed milk 10% in PBS (30 min), followed by Protein Block kit (Springer; 30  
189 min). Sections were then incubated overnight with anti-P-gp (mouse monoclonal;  
190 Santa Cruz Biotechnology, EUA; 1:500), anti-ABCA1 (mouse monoclonal; Abcam,  
191 EUA; 1:100), anti-BCRP (mouse monoclonal; Merck Millipore, GER; 1:200) and  
192 anti-ABCG1 (rabbit polyclonal; ThermoFisher Scientific, EUA; 1:100) antibodies.  
193 Visualization of protein was performed using the Springer kit following the  
194 manufacturer's instructions. Sections were stained with hematoxylin. Omission of the  
195 primary antibody provided negative controls.

196 Evaluation of the area and intensity of the immunolabeled yolk sac  
197 components (endodermal epithelium, connective tissue, endothelium and  
198 mesothelium) was performed using a semi-quantitative scoring described previously,  
199 with modifications [16,32]. For the immunolabeled area, the scores were: 0)  
200 undetectable; 1) 1-25%; 2) 26-50%; 3) 51-75%; and 4) 76-100%. For intensity  
201 immunolabeling, graded scores were: 0) no detectable staining; 1) weak; 2) moderate;  
202 3) strong; and 4) very strong intensity. At least 5 fields were evaluated (20x  
203 magnification) for each dam. Two operators blinded to the experimental groups  
204 performed independent evaluation. An average of the scores for both evaluations was  
205 calculated.

206

## 207 Statistical Method

208 Values are expressed as mean  $\pm$  standard error of the mean (SEM) and were  
209 analyzed using Prisma program (GraphPad Software Inc., CA, USA). Statistical  
210 assessment of volumetric dimensions, qPCR and immunohistochemistry data were  
211 undertaken in the yolk sac of fetuses exhibiting the closest placental weight to the  
212 mean weight of all placentae from each litter. Thus "n" represents the number of  
213 litters [9,33]. After confirming the non-parametric distribution of the data and  
214 exclusion of outliers (Grubbs' test), differences between PBA-infected and control  
215 groups were assessed by non-parametric Mann-Whitney test, when comparing two  
216 variables; and by Kruskal Wallis test, followed by Dunn's post-test, when comparing  
217 more than two variables. Statistical significance was considered when  $p < 0.05$ .

218

## 219 RESULTS

### 220 *Malaria does not affect visceral yolk sac histomorphological parameters*

221 The wall of the visceral yolk sac in both PBA-infected and control animals  
222 exhibited its three typical layers: an outer (uterine facing) endodermic epithelium, a  
223 blood vessel-enriched mesodermal mid-layer and an inner (amnion facing)  
224 mesothelial layer. There were no visible differences in gross morphology of these  
225 layers between infected and control groups (Figure 1A and B). Additionally, MiP did  
226 not affect the volumes of the histological components of the yolk sac, comparing  
227 PBA-infected and control groups (Figure 1A). Of note, constitutive endodermic  
228 epithelium comprised approximately 66% of the total yolk sac cell number, whereas  
229 the constitutive mesothelium formed approximately 5% of the total number of yolk  
230 sac cells (Figure 1C).

231

### 232 *Malaria modifies expression of ABC efflux transporters and pro-inflammatory factors* 233 *in the yolk sac*

234 mRNA of all ABC transporters evaluated (*Abca1*, *Abcb1a*, *Abcb1b*, *Abcg1* and  
235 *Abcg2*) was detected in the mouse visceral yolk sac at term (GD18.5) in both control  
236 and in PBA-infected experimental groups. *Abcb1a* mRNA was up-regulated, whereas  
237 *Abcg1* was down-regulated in the yolk sac of infected animals, compared to controls  
238 ( $p < 0.05$ , Figure 2). No changes in *Abca1*, *Abcb1b* and *Abcg2* were observed. Analysis  
239 of other active transmembrane (intake) transporters in the yolk sac revealed that *Snat1*  
240 and *Snat2* mRNA levels were unaffected by MiP; *Snat4* and *Glut1* transcripts were  
241 undetectable in both experimental groups. At the level of the pro-inflammatory genes,  
242 we detected increased levels of the macrophage migration inhibitory factor (the *Mif*-  
243 chemokine) mRNA, while interleukin (*Il*)- $1\beta$  and C-C Motif Chemokine Ligand 2  
244 (*Ccl2*) mRNA remained unchanged. Transcripts of *Il-6* and chemokine (C-X-C motif)  
245 ligand 1 (*Cxcl1*, a human *Il-8* analog) were not detectable in the yolk sac (Figure 2).

246

### 247 *Malaria in pregnancy modifies P-gp and Abca1 protein in the yolk sac*

248 We next evaluated the effects of PBA infection on protein localization and  
249 expression (semi-quantitative) of the ABC transporter that exhibited altered gene  
250 expression following infection. P-gp was enriched in the apical membrane and



251 cytoplasm of the outer endodermic epithelium and inner mesothelial cells. The  
252 endothelium of blood vessels, localized in the mesodermal mid-layer, exhibited faint  
253 or no P-gp labeling, whereas the mesodermal layer connective tissue was completely  
254 negative for P-gp (Figure 3A and B). In PBA-infected pregnancies, distribution of  
255 yolk sac P-gp was similar to controls, however, semi-quantitative analysis revealed  
256 increased P-gp protein in the plasma membranes of the endodermic epithelium and  
257 mesothelium ( $p < 0.05$ ), with no changes in the total area of P-gp immunolabeling  
258 (Figure 3F and G).

259 ABCG1 protein was detected in both the endodermic epithelium and in the  
260 endothelium of mesodermal vessels of the yolk sac, with lower levels of ABCG1  
261 detected in the mesothelium. No ABCG1 was detected in the mesodermal layer  
262 connective tissue (Figures 4A and B). There were no differences in ABCG1  
263 immunostaining area and intensity between PBA-infected and control pregnancies  
264 (Figures 4F and G).

265 A disconnect between mRNA and protein expression patterns for some ABC  
266 transporters have been previously reported in the placenta [16,34]. As such, we  
267 conducted immunohistochemical analysis of ABCA1 lipid and BCRP drug  
268 transporters in the mouse yolk sac. ABCA1 was primarily localized to the endodermic  
269 epithelium, with heterogeneous intensity. In addition, the cytoplasm of some  
270 epithelial cells was positive for ABCA1. The mesothelium and the endothelium of  
271 mesodermal vessels were also stained, but with less intensity compared to the  
272 endodermic epithelium (Figure 5A and B). No ABCA1 staining was observed in the  
273 connective tissue. Semi-quantitative analysis showed that both area and intensity of  
274 ABCA1 staining were increased in the endothelium of the mesodermal blood vessels  
275 ( $p < 0.05$ ) in MiP, with no changes in the endodermic epithelium or in the  
276 mesothelium (Figure 5F and G).

277 BCRP staining was localized to the endodermic epithelium and in the  
278 endothelium of mesodermal vessels, with lower levels in the mesothelium regions of  
279 the yolk sac. Semi-quantitative analysis revealed no effect of MiP on BCRP in any  
280 regions of the yolk sac (Figures 6A and B). As predicted, mouse placentae-positive  
281 controls exhibited intense ABCA1, ABCG1, BCRP and P-gp staining in labyrinthine  
282 and in junctional zone cells (Figure 3-6E), whereas negative controls showed minimal  
283 signal (Figure 3-6C and D).

284

285 DISCUSSION

286 Our study provides new insights into how the yolk sac exerts embryo and fetal  
287 protection. We have also demonstrated how MiP impacts the expression of  
288 transporters that modulate yolk sac permeability to drugs, environmental toxins and  
289 nutrients. Using a mouse model of malaria induced-IUGR and PTL, we detected  
290 increased expression of P-gp/*Abcb1a* and *Mif*-chemokine in the yolk sac, and  
291 endothelial ABCA1 staining in blood vessels. In contrast, we demonstrated a decrease  
292 yolk sac *Abcg1* mRNA levels in MiP.

293 Previously, we have demonstrated that MiP impairs the placental expression of  
294 ABCA1/*Abca1*, P-gp/*Abcb1b* and BCRP/*Abcg2*, which were accompanied by  
295 increased placental levels of *Cxcl1* and *Ccl2* mRNA and upregulation of maternal *Il1-*  
296  $\beta$ , *Il-6*, *Cxcl1* and *Ccl2* [9]. In the previous study, we provided evidence that MiP has  
297 the potential to increase fetal exposure to drugs and environmental toxins, via  
298 downregulation of major placental drug and nutrient ABC efflux transporters [9].  
299 Moreover, other studies have demonstrated the sensitivity of placental P-gp and  
300 BCRP to infection. C57BL/6 mice exposed to sublethal (fetal) LPS in mid pregnancy,  
301 exhibited impaired placental P-gp activity [18], while polyinosinic:polycytidylic acid  
302 (PolyI:C, a viral mimic), had no effect on placental P-gp activity [35]. Human first  
303 trimester placentae exposed to lipopolysaccharide (LPS, a bacterial antigen),  
304 exhibited decreased P-gp/*ABCB1* and BCRP/*ABCG2* levels [36]. In contrast, human  
305 chorioamnionitis in 2<sup>nd</sup> trimester, often resulting from polymicrobial infection [37],  
306 resulted in decreased P-gp levels but elevated BCRP expression [16]. Further,  
307 extravillous trophoblast (HTR8/SVneo)-like cells treated with LPS and single  
308 stranded RNA (ssRNA, another viral mimic), showed a profound downregulation of  
309 BCRP/*ABCG2* [14]. Together these studies demonstrate that the nature of the  
310 infective stimuli, determines the type of the drug efflux transporter response in  
311 different trophoblast lineages.

312 Notably, in the present study, we did not observe substantial up-regulation of  
313 pro-inflammatory factors in the yolk sac following MiP. Out of the five pro-  
314 inflammatory genes investigated, *Mif* chemokine was up-regulated, *Il-1 $\beta$*  and *Ccl2*  
315 were unchanged and *Il-6* and *Cxcl1* were not detectible. In this context, the MIF  
316 chemokine is present at high levels in the amniotic fluid of women in PTL with

317 infection and its expression is increased in chorioamniotic membranes during  
318 infection [38].

319         The pattern of the pro-inflammatory response observed in the yolk sac is in  
320 contrast with our previous report showing placental up-regulation of *Cxcl1* and *Ccl2*,  
321 induced by MiP [9]. Together, these results suggest that the yolk sac mounts a blunted  
322 pro-inflammatory response to systemic malarial infection when compared to the  
323 placenta. The placenta would appear to be efficient in buffering the transfer of  
324 malarial antigens and related pro-inflammatory cytokines/chemokines to the yolk sac  
325 and to the embryo/fetus. This may explain, at least in part, the different ABC  
326 transporter response pattern in the yolk sac, compared to the placenta.

327         In rodents, P-gp is encoded by two different gene isoforms, *Abcb1a* and  
328 *Abcb1b*. Yolk sac *Abcb1a* was the gene isoform up-regulated by MiP and was  
329 associated with increased P-gp immunostaining in both the uterine-facing membrane  
330 of endodermic cells and in the inner, amnion side-facing, mesothelial cells. While  
331 MiP did not alter the morphology of the yolk sac wall, the changes in P-gp and  
332 ABCA1, likely alter the barrier function of the yolk sac. However our morphometric  
333 analysis detected a higher number of constitutive outer endodermic cells ( $\approx 66\%$ ) in  
334 comparison to inner mesothelial cells ( $\approx 5\%$ ); in the control and MiP groups. This  
335 higher number of constitutive endodermic cells in the yolk sac, in concert with  
336 increased cell membrane P-gp, suggest that MiP leads to a greater net outflow of P-gp  
337 substrates from the fetal side, towards the uterine cavity (endoderm-mediated), rather  
338 than into the fetal side (mesothelium-mediated), likely favoring fetal protection.

339         Apart from drugs and environmental toxins, P-gp also transports pro-  
340 inflammatory compounds, IL-2, INF- $\gamma$ , TNF- $\alpha$  and CCL2. As such, it can play an  
341 important role in the regulation of local inflammatory response [39,40]. Up-regulation  
342 of yolk sac P-gp in PBA-infected dams indicates this membrane has the potential to  
343 act together with other gestational tissues, such as the placenta, to participate in the  
344 immunomodulatory response to MiP. It is currently unknown whether this represents  
345 a compensatory mechanism to circumvent decreased placental P-gp and BCRP  
346 expression induced by MiP, or if this is an inherent response to MiP infection. This  
347 clearly requires further investigation.

348         Despite reduced yolk sac *Abcg1*, no changes in ABCG1 staining were  
349 observed. In contrast, increased ABCA1 levels were detected only in yolk sac  
350 endothelial cells of PBA-infected pregnancies. ABCA1 and ABCG1 are important

351 cholesterol transporters, located on both the plasma and endosomal cell membranes  
352 [41]. In gestational tissues, apart from being localized in human syncytiotrophoblasts,  
353 ABCA1 and ABCG1 are also present in fetal endothelial cells of the placenta, acting  
354 in the exchange of cholesterol and phospholipids in the maternal interface [12,42].  
355 Importantly, ABCA1 can also be localized in intracellular compartments such as the  
356 endoplasmic reticulum, functioning as regulator of intracellular signaling, cell  
357 differentiation, and hormone metabolism [43]. Changes in the expression of  
358 cholesterol transporters may adversely impact pregnancy outcome. Inhibition of  
359 ABCG1 and ABCA1 expression by siRNA transfection increased the sensitivity of  
360 human trophoblast cells to cytotoxic 25-hydroxycholesterol and 7-ketocholesterol  
361 oxysteroids, resulting from placental oxidative stress. On the other hand, induction of  
362 ABCA1 and ABCG1 in the trophoblast conferred placental protection against these  
363 agents [42], demonstrating an important role of these lipid efflux transporters  
364 protecting trophoblast cells against cytotoxic lipid derivatives. Furthermore, disruption  
365 of ABCA1 and ABCG1 may be harmful to the establishment of pregnancy and  
366 placentation, since they regulate hormone synthesis and nutrient transport in the  
367 placenta [44]. Increased vascular ABCA1 may be the result of the yolk sac attempting  
368 to maintain normal cholesterol homeostasis in the fetal compartment, given that  
369 cholesterol is an essential element for the development and survival of the central  
370 nervous and other fetal organ systems [16,45].

371 In addition, we did not identify changes in gene expression of neutral amino  
372 acid transporters (*Snat1* and *Snat2*) or of *Snat4* and *Glut1* glucose transporters in the  
373 yolk sac in MiP. Such data suggest that gene expression of neutral amino acid and  
374 glucose transporters, at least in term pregnancies, is less impacted by malarial  
375 infection.

376 In conclusion, we have shown, for the first time, that yolk sac efflux transport  
377 potential may be disrupted by MiP. The presence of ABC transporters in the yolk sac  
378 wall and their selective alterations induced by MiP, suggest that this fetal membrane  
379 acts as an important protective gestational barrier under normal conditions as well as  
380 in malaria disease. Changes in the expression pattern of yolk sac ABCA1 and P-gp  
381 may alter the biodistribution of toxic substances, xenobiotics, nutrients and  
382 immunological factors within the fetal compartment and therefore participate in the  
383 pathogenesis of malaria induced-IUGR and PTL. In addition, based on our data, it is  
384 possible to hypothesize that MiP, along with other infective processes, has the

385 potential to disrupt the human yolk sac protective barrier and thus impact early  
386 pregnancy outcome. This highlights the importance of investigating the human yolk  
387 sac response to infection.

388

#### 389 ACKNOWLEDGEMENTS

390 We thank Carlos Henrique da Silva for technical assistance and Drs. Cristina  
391 Fonseca Guatimosim and Patricia Massara Martinelli for assistance in imaging  
392 analysis and acquisition.

393

#### 394 FUNDING

395 This study was supported by the Bill & Melinda Gates Foundation  
396 (MCTI/CNPq/MS/SCTIE/Decit/Bill and Melinda Gates 05/2013; OPP1107597), the  
397 Canadian Institutes for Health Research (SGM: Foundation-148368), Conselho  
398 Nacional de Desenvolvimento Científico e Tecnológico (CNPq; 304667/2016-1,  
399 422441/2016-3, 303734/2012-4, 422410/2016-0); Coordenação de Aperfeiçoamento  
400 Pessoal de Nível Superior (CAPES, finance Code 001); Fundação de Amparo à  
401 Pesquisa do Estado do Rio de Janeiro (FAPERJ, CNE 2015/E26/203.190/2015); and  
402 PRPq-Universidade Federal de Minas Gerais (PRPq-UFMG, 26048).

403

#### 404 CONFLICT OF INTERESTS

405 The authors confirm that there are no conflicts of interest

406

#### 407 DATA AVAILABILITY STATEMENT

408 The data that support the findings of this study are available from the corresponding  
409 author upon reasonable request.

410

#### 411 REFERENCES

412 1- Desai M, ter Kuile FO, Nosten F, *et al.* Epidemiology and burden of malaria in  
413 pregnancy. *Lancet Infect Dis.* 2007; **7**: 93-104.

414

415 2- Sharma L, Shukla G. Placental Malaria: A new insight into the Pathophysiology.  
416 *Front Med.* 2017; **4**:117.

417

- 418 3- Harrington WE, Kakuru A, Jagannathan P. Malaria in pregnancy shapes the  
419 development of fetal and infant immunity. *Parasite Immunol.* 2019; **41**:e12573  
420
- 421 4- Ayres Pereira M, Clausen TM, Pehrson C, *et al.* Placental Sequestration of  
422 Plasmodium falciparum Malaria Parasites Is Mediated by the Interaction Between  
423 VAR2CSA and Chondroitin Sulfate A on Syndecan-1. *PLoS Pathog.* 2016;  
424 **12**:e1005831.  
425
- 426 5- Rogerson SJ, Hviid L, Duffy PE, *et al.* Malaria in pregnancy: pathogenesis and  
427 immunity. *Lancet Infect Dis.* 2007; **7**: 105-17.  
428
- 429 6- Boeuf P, Aitken EH, Chandrasiri U, *et al.* Plasmodium falciparum Malaria Elicits  
430 Inflammatory Responses that Dysregulate Placental Amino Acid Transport. *PLoS*  
431 *Pathog.* 2013; **2**:e1003153.  
432
- 433 7- Umbers AJ, Aitken EH, Rogerson SJ. Malaria in pregnancy: small babies, big  
434 problem. *Trends Parasitol.* 2011; **27**: 168-75.  
435
- 436 8- Najjar N, McColl ER, Weckman A, *et al.* Dysregulation of solute carrier  
437 transporters in malaria-infected pregnant mice. *Parasite Immunol.* 2019; **41**:e12614  
438
- 439 9- Fontes KN, Reginatto MW, Silva NL, *et al.* Dysregulation of placental ABC  
440 transporters in a murine model of malaria-induced preterm labor. *Sci Rep*, 2019;  
441 **9**:11488.  
442
- 443 10- Chandrasiri UP, Chua CLL, Umbers AJ, *et al.* Insight Into the Pathogenesis of  
444 Fetal Growth Restriction in Placental Malaria: Decreased Placental Glucose  
445 Transporter Isoform 1 Expression. *J Infect Dis.* 2013; **209**: 1663-7.  
446
- 447 11- Cressman AM, McDonald CR, Silver K, *et al.* Malaria Infection Alters the  
448 Expression of Hepatobiliary and Placental Drug Transporters in Pregnant Mice. *Drug*  
449 *Metab Dispos.* 2014; **42**: 603-10.  
450
- 451 12- Bloise E, Ortiga-Carvalho TM, Reis FM, *et al.* ATP-binding cassette transporters  
452 in reproduction: a new frontier. *Hum Reprod Update*, 2015; **22**: 164-81.  
453
- 454 13- Dunk CE, Pappas JJ, Lye P, *et al.* P-Glycoprotein (P-gp)/ABCB1 plays a  
455 functional role in extravillous trophoblast (EVT) invasion and is decreased in the pre-  
456 eclamptic placenta. *J Cell Mol Med*, 2018; **22**:5378-5393.  
457
- 458 14- Lye P, Bloise E, Nadeem L, *et al.* Breast Cancer Resistance Protein  
459 (BCRP/ABCG2) Inhibits Extra Villous Trophoblast Migration: The Impact of  
460 Bacterial and Viral Infection. *Cells*, 2019; **8**: 1150.
- 461 15- Evseenko DA, Murthi P, Paxton JW, *et al.* The ABC transporter BCRP/ABCG2 is  
462 a placental survival factor, and its expression is reduced in idiopathic human fetal  
463 growth restriction. *FASEB J*, 2007; **21**: 3592-605.  
464
- 465 16- Do Imperio GE, Bloise E, Javam M, *et al.* Chorioamnionitis Induces a Specific  
466 Signature of Placental ABC Transporters Associated with an Increase of miR-331-5p  
467 in the Human Preterm Placenta. *Cell Physiol Biochem*, 2018; **45**: 591–604.

- 468  
469 17- Mason CW, Buhimschi IA, Buhimschi CS, *et al.* ATP-Binding Cassette  
470 Transporter Expression in Human Placenta as a Function of Pregnancy Condition.  
471 *Drug Metab Dispos*, 2011; **39**: 1000-7.  
472  
473 18- Bloise E, Bhuiyan M, Audette MC, *et al.* Prenatal Endotoxemia and Placental  
474 Drug Transport in The Mouse: Placental Size-Specific Effects. *PLoS One*, 2013; **8**:  
475 e65728.  
476  
477 19- Imperio GE, Javam M, Lye P, *et al.* Gestational age-dependent gene expression  
478 profiling of ATP-binding cassette transporters in the healthy human placenta. *J Cell*  
479 *Mol Med*, 2019; **23**: 610-8.  
480  
481 20- Choudhuri S, Klaassen CD. Structure, Function, Expression, Genomic  
482 Organization, and Single Nucleotide Polymorphisms of Human ABCB1 (MDR1),  
483 ABCC (MRP), and ABCG2 (BCRP) Efflux Transporters. *Int J Toxicol*, 2006; **25**:  
484 231-59.  
485  
486 21- Tarling EJ, Vallim TQA, Edwards PA. Role of ABC transporters in lipid transport  
487 and human disease. *Trends Endocrinol Metab*, 2013; **24**: 342-50.  
488  
489 22- McGrath KE, Palis J. Hematopoiesis in the yolk sac: more than meets the eye.  
490 *Exp Hematol*, 2005; **33**: 1021-8.  
491  
492 23- Mamsen LS, Brøchner CB, Byskov AG, Møllgard K. The migration and loss of  
493 human primordial germ stem cells from the hind gut epithelium towards the gonadal  
494 ridge. *Int J Dev Biol*, 2012; **56**: 771-8.  
495  
496 24- Cindrova-Davies T, Jauniaux E, Elliot MG, *et al.* RNA-seq reveals conservation  
497 of function among the yolk sacs of human, mouse, and chicken. *Proc Natl Acad Sci*  
498 *USA*, 2017; **114**:E4753-E4761  
499  
500 25- Pereda J, Motta PM. New advances in human embryology: morphofunctional  
501 relationship between the embryo and the yolk sac. *Med Electron Microsc*, 1999; **32**:  
502 67-78.  
503  
504 26- Zohn IE, Sarkar AA. The Visceral Yolk Sac Endoderm Provides for Absorption  
505 of Nutrients to the Embryo during Neurulation. *Birth Defects Res A Clin Mol Teratol*,  
506 2010; **88**: 593-600.  
507  
508 27- Jollie WP. Development, Morphology, and Function of the Yolk-Sac Placenta of  
509 Laboratory Rodents. *Teratology*, 1990; **41**: 361-81.  
510 28- Carter AM, Enders AC. Placentation in mammals: definitive placenta, yolk sac  
511 and paraplacenta. *Theriogenology*, 2016; **86**: 278-87.  
512  
513 29- Kalabis GM, Petropoulos S, Gibb W, Matthews SG. Breast Cancer Resistance  
514 Protein (Bcrp1/*Abcg2*) in Mouse Placenta and Yolk Sac: Ontogeny and its Regulation  
515 by Progesterone. *Placenta*, 2007; **28**: 1073-81.  
516

- 517 30- Mayhew TM. Allometric studies on growth and development of the human  
518 placenta: growth of tissue compartments and diffusive conductances in relation to  
519 placental volume and fetal mass. *J Anat*, 2006; **208**: 785-94.  
520
- 521 31- Livak KJ, Schmittgen TD. Analysis of relative gene expression data using real-  
522 time quantitative PCR and the 2(-Delta Delta C(T)) Method. *Methods*, 2001; **25**: 402-  
523 8.  
524
- 525 32- Bloise E, Couto HL, Massai L, *et al.* Differential expression of follistatin and  
526 FLRG in human breast proliferative disorders. *BMC Cancer*, 2009; **9**:320.  
527
- 528 33- Bloise E, Lin W, Liu X, *et al.* Impaired Placental Nutrient Transport in Mice  
529 Generated by in Vitro Fertilization. *Endocrinology*, 2012; **153**: 3457-67.  
530
- 531 34- Lye P, Bloise E, Nadeem L, *et al.* Glucocorticoids modulate multidrug resistance  
532 transporters in the first trimester human placenta. *J Cell Mol Med*, 2018; **22**: 3652- 60.  
533
- 534 35- Bloise E, Petropoulos S, Iqbal M, *et al.* Acute Effects of Viral Exposure on P-  
535 Glycoprotein Function in the Mouse Fetal Blood-Brain Barrier. *Cell Physiol Biochem*,  
536 2017; **41**: 1044-50.
- 537 36- Lye P, Bloise E, Javam M, *et al.* Impact of bacterial and viral challenge on  
538 multidrug resistance in first- and third-trimester human placenta. *Am J Pathol*, 2015;  
539 **185**: 1666-75.
- 540
- 541 37- Conti N, Torricelli M, Voltolini C, *et al.* Term histologic chorioamnionitis: a  
542 heterogeneous condition. *Eur J Obstet Gynecol Reprod Biol.*, 2015; **188**: 34-8.  
543
- 544 38- Chaiworapongsa T, Romero R, Chaiworapongsa T, *et al.* Macrophage migration  
545 inhibitory factor in patients with preterm parturition and microbial invasion of the  
546 amniotic cavity. *J Matern Fetal Neonatal Med*, 2005; **18**: 405-16.  
547
- 548
- 549 39- Pawlik A, Baškiewicz-Masiuk M, Machaliński B, *et al.* Involvement of P-  
550 glycoprotein in the release of cytokines from peripheral blood mononuclear cells  
551 treated with methotrexate and dexamethasone. *J Pharm Pharmacol*, 2005; **57**: 1421-5.  
552
- 553 40- Kooij G, Backer R, Koning JJ, *et al.* P-glycoprotein acts as an immunomodulator  
554 during neuroinflammation. *PLoS One*, 2009; **8**:4:e8212  
555
- 556 41- Neufeld EB, O'Brien K, Walts AD, *et al.* Cellular Localization and Trafficking of  
557 the Human ABCG1 Transporter. *Biology*, 2014; **3**: 781-800.  
558
- 559 42- Aye ILMH, Waddell BJ, Mark PJ, Keelan JA. Placental ABCA1 and ABCG1  
560 transporters efflux cholesterol and protect trophoblasts from oxysterol induced  
561 toxicity. *Biochim Biophys Acta*, 2010; **1801**: 1013-24.  
562
- 563 43- Nikitina L, Wenger F, Baumann M, *et al.* Expression and localization pattern of  
564 ABCA1 in diverse human placental primary cells and tissues. *Placenta*, 2011; **32**:  
565 420-30.



566

567 44- Chatuphonprasert W, Jarukamjorn K, Ellinger I. Physiology and Pathophysiology  
568 of Steroid Biosynthesis, Transport and Metabolism in the Human Placenta. *Front*  
569 *Pharmacol*, 2018; **12**;9:1027.

570

571 45- Plösch T, van Straten EME, Kuipers F. Cholesterol Transport by the Placenta:  
572 Placental Liver X Receptor Activity as a Modulator of Fetal Cholesterol Metabolism?  
573 *Placenta*, 2007; **28**: 604-10.

| Gene                          | Sequence (5' - 3')                                       | Encoded Protein                              | Reference                     |
|-------------------------------|----------------------------------------------------------|----------------------------------------------|-------------------------------|
| <i>Abca1</i>                  | F:GCAGATCAAGCATCCCAACT<br>R:CCAGAGAATGTTTCATTGTCCA       | ABCA1                                        | Hirai <i>et al.</i> ,<br>2007 |
| <i>Abcb1a</i>                 | F:CTCTATTGGACAAGTGCTCACTG<br>R:CTCCTCGTGCATTGGCGAA       | P-glycoprotein<br>(P-gp)                     | Hirai <i>et al.</i> ,<br>2007 |
| <i>Abcb1b</i>                 | F:AAGCCAGTATTCTGCCAAGCAT<br>R:CTCCAGACTGCTGTTGCTGATG     | P-glycoprotein<br>(P-gp)                     | Hirai <i>et al.</i> ,<br>2007 |
| <i>Abcg1</i>                  | F:GCTCCATCGTCTGTACCATCC<br>R:ACGCATTGTCCTTGACTTAGG       | ABCG1                                        | *                             |
| <i>Abcg2</i>                  | F:GCCGTTAGGACGCTCGCAGA<br>R:TAGCAACGAAGACTTGCCCTCCGC     | Breast cancer<br>related protein<br>(BCRP)   | Merrell <i>et al.</i> , 2014  |
| <i>Snat1</i>                  | F:GGACGGAGATAAAGGCACTC<br>R:CAGAGGGATGCTGATCAAGG         | SNAT1                                        | Jones <i>et al.</i> ,<br>2014 |
| <i>Snat2</i>                  | F:ACCTTTGGTGATCAAGGCAT<br>R:AGGACCAGATAGTCACCGTT         | SNAT2                                        | Jones <i>et al.</i> ,<br>2014 |
| <i>Snat4</i>                  | F:TACAGGCAGGAACGCGAAG<br>R:GGTTGAACACTGACATTCCGA         | SNAT4                                        | *                             |
| <i>Glut1</i>                  | F:CCAGCTGGGAATCGTCGT<br>R:CAAGTCTGCATTGCCCATGAT          | GLUT1                                        | Feil <i>et al.</i> ,<br>2006  |
| <i>Ccl2</i>                   | F:AGGTCCCTGTCATGCTTCTG<br>R:ATCTGGACCCATTCCTTCTTG        | C-C Motif<br>Chemokine<br>Ligand 2<br>(CCL2) | Zammit <i>et al.</i> , 2013   |
| <i>IL-6</i>                   | F:GAGGATACCACTCCCAACAGACC<br>R:AAGTGCATCATCGTTGTTTCATACA | Interleukin<br>(IL-6)                        | Murakami <i>et al.</i> , 2013 |
| <i>IL-1<math>\beta</math></i> | F:TTGACGGACCCCAAAGATG<br>R:AGAAGGTGCTCATGTCCTCA          | Interleukin<br>(IL-1 $\beta$ )               | *                             |
| <i>Mif</i>                    | F:GCCAGAGGGGTTTCTGTCTG<br>R:GTTTCGTGCCGCTAAAAGTCA        | Macrophage<br>inhibitory factor<br>(MIF)     | Zhang <i>et al.</i> ,<br>2014 |
| <i>Cxcl1</i>                  | F:ACCCGCTCGCTTCTCTGT                                     | C-X-C Motif                                  | Murakami <i>et</i>            |

|              |                                                       |                                  |                              |
|--------------|-------------------------------------------------------|----------------------------------|------------------------------|
|              | R:AAGGGAGCTTCAGGGTCAAG                                | Chemokine<br>Ligand 1<br>(CXCL1) | <i>al.</i> , 2013            |
| <i>Ywhaz</i> | F:GAAAAGTTCTTGATCCCCAATGC<br>R:TGTGACTGGTCCACAATTCCTT | YWHAZ                            | *                            |
| <i>Gapdh</i> | F:TGTGTCCGTCGTGGATCTGA<br>R:TTGCTGTTGAAGTCGCAGGAG     | GAPDH                            | Gong <i>et al.</i> ,<br>2014 |
| <i>Ppib</i>  | F:GAGACTTCACCAGGGG<br>R:CTGTCTGTCTTGGTCCTCTCC         | PPIB                             | *                            |

574 Table 1. Primers used for qPCR.

575 \*Gene specific primers were designed with primer-BLAST ([http://www.ncbi.nlm.gov/tools/primer-](http://www.ncbi.nlm.gov/tools/primer-blast)  
576 [blast](http://www.ncbi.nlm.gov/tools/primer-blast)).

577 **Figure 1. Malaria in pregnancy (MiP) does not affect visceral yolk sac**  
578 **morphology and morphometry.** A-B: yolk sac photomicrographs (HE) of (A)  
579 control and (B) *Plasmodium berghei* ANKA (PBA) infected dams. C) Volumetric  
580 proportion of the yolk sac histological components from control and PBA-infected  
581 dams at GD18.5. Arrowheads = endodermic epithelium; thin arrows = mesothelium; \*  
582 = mesodermic blood vessels. Statistical differences were tested by Kruskal Wallis  
583 test, followed by Dun's post-test. Data are presented as mean  $\pm$  SEM (n=6/group).  
584 Magnification bars represent 50  $\mu$ m. 1% of structures found were classified as  
585 artifacts.

586

587 **Figure 2. Malaria in pregnancy (MiP) modifies the yolk sac gene expression of**  
588 **specific ABC efflux transporters and pro-inflammatory factors.** Relative mRNA  
589 expression of selected ABC (*Abca1*, *Abcb1a*, *Abcb1b*, *Abcg1* and *Abcg2*) and nutrient  
590 (*Snat1* and *Snat2*) transporters, as well as selected cytokines and chemokines (*Il-1 $\beta$* ,  
591 *Ccl2* and *Mif*) in the yolk sac from *Plasmodium berghei* ANKA-infected dams at  
592 GD18.5. Transcripts of *Il-6*, *Cxcl1*, *Glut1* and *Snat4* were under detectible limits.  
593 Statistical differences were tested by Mann Whitney test. \*p<0.05. Data are presented as  
594 mean  $\pm$  SEM (n=6/group).

595

596 **Figure 3. P-glycoprotein (P-gp) is localized in distinct cellular barriers of the**  
597 **murine yolk sac and is upregulated by malaria in pregnancy (MiP).** A-E:  
598 Representative immunohistochemistry (IHC) images from murine yolk sac sections of

599 control (A) and (B) *Plasmodium berghei* ANKA-infected dams at GD18.5. C-D: yolk  
600 sac (C) and placental (D) negative controls. (E) placental positive control showing P-gp  
601 immunoreactivity in labyrinthine and junctional zone cells. F-G: Semiquantitative  
602 evaluation of the area (F) and intensity (G) of P-gp immunolabeling. Arrowheads =  
603 endodermic epithelium; thin arrows = mesothelium; \* = mesodermal blood vessels.  
604 Statistical differences were tested by Mann Whitney test. \* $p < 0.05$ . Data are presented as  
605 mean  $\pm$  SEM (n=6/group). Magnification bars represent 100  $\mu$ m.

606

607 **Figure 4. ABCG1 immunolocalization in the murine yolk sac.** A-E: Representative  
608 immunohistochemistry (IHC) images from murine yolk sac sections of control (A) and  
609 (B) *Plasmodium berghei* ANKA-infected dams at GD18.5. C-D: yolk sac (C) and  
610 placental (D) negative controls. (E) placental positive control showing ABCG1  
611 immunoreactivity in labyrinthine and junctional zone cells. F-G: Semiquantitative  
612 evaluation of the area (F) and intensity (G) of ABCG1 immunolabeling. Arrowheads =  
613 endodermic epithelium; thin arrows = mesothelium; \* = mesodermal blood vessels.  
614 Statistical differences were tested by Mann Whitney test. Data are presented as mean  $\pm$   
615 SEM (n=6/group). Magnification bars represent 100  $\mu$ m.

616

617 **Figure 5. ABCA1 staining is increased in the endothelium of the mesodermal blood**  
618 **vessels in malaria-infected dams.** A-E: Representative immunohistochemistry (IHC)  
619 images from murine yolk sac sections of control (A) and (B) *Plasmodium berghei*  
620 ANKA-infected dams at GD18.5. C-D: yolk sac (C) and placental (D) negative controls.  
621 (E) placental positive control showing ABCA1 immunoreactivity in labyrinthine and  
622 junctional zone cells. F-G: Semiquantitative evaluation of the area (F) and intensity (G)  
623 of ABCA1 immunolabeling. Arrowheads = endodermic epithelium; thin arrows =  
624 mesothelium; \* = mesodermal blood vessels. Statistical differences were tested by  
625 Mann Whitney test. \* $p < 0.05$ . Data are presented as mean  $\pm$  SEM (n=6/group).  
626 Magnification bars represent 100  $\mu$ m.

627

628 **Figure 6. BCRP immunolocalization in the murine yolk sac.** A-E: Representative  
629 immunohistochemistry (IHC) images from murine yolk sac sections of control (A) and

630 (B) *Plasmodium berghei* ANKA-infected dams at GD18.5. C-D: yolk sac (C) and  
631 placental (D) negative controls. (E) placental positive control showing BCRP  
632 immunoreactivity in labyrinthine and junctional zone cells. F-G: Semiquantitative  
633 evaluation of the area (F) and intensity (G) of BCRP immunolabeling. Arrowheads =  
634 endodermic epithelium; thin arrows = mesothelium; \* = mesodermal blood vessels.  
635 Statistical differences were tested by Mann Whitney test. Data are presented as mean  $\pm$   
636 SEM (n=6/group). Magnification bars represent 100  $\mu$ m.

637

638

639

control

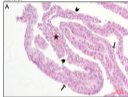

malaria in pregnancy

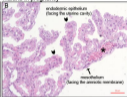

C

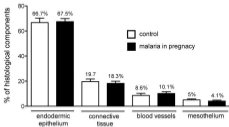

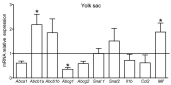

control

malaria in pregnancy

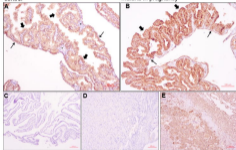

yolk sac negative control

placenta negative control

placenta positive control

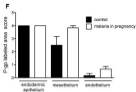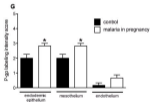

control

malaria in pregnancy

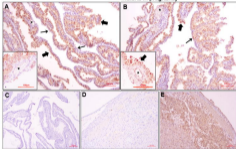

yolk sac negative control

placenta negative control

placenta positive control

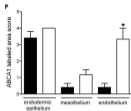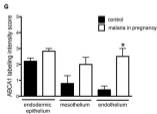



control

malaria in pregnancy

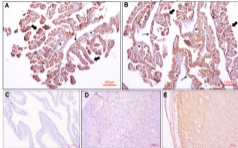

yolk sac negative control

placenta negative control

placenta positive control

F

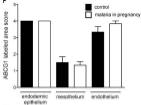

G

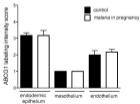

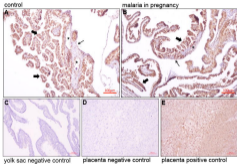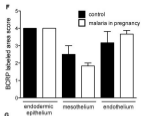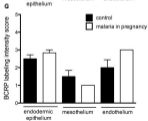

Source: https://www.biorxiv.org/content/10.1101/2020.06.27.175018v1.full.pdf
